# Supplementary material for: Pulsed laser synthesis of carbon-overdoped tungsten with a body-centered orthorhombic structure and planar defects
Source: Royal Society of Chemistry journal article supplement (doi:10.1039/c5ce00576k), 2015-01-01
Supplement: c5ce00576k1.pdf [file c5ce00576k1.pdf]

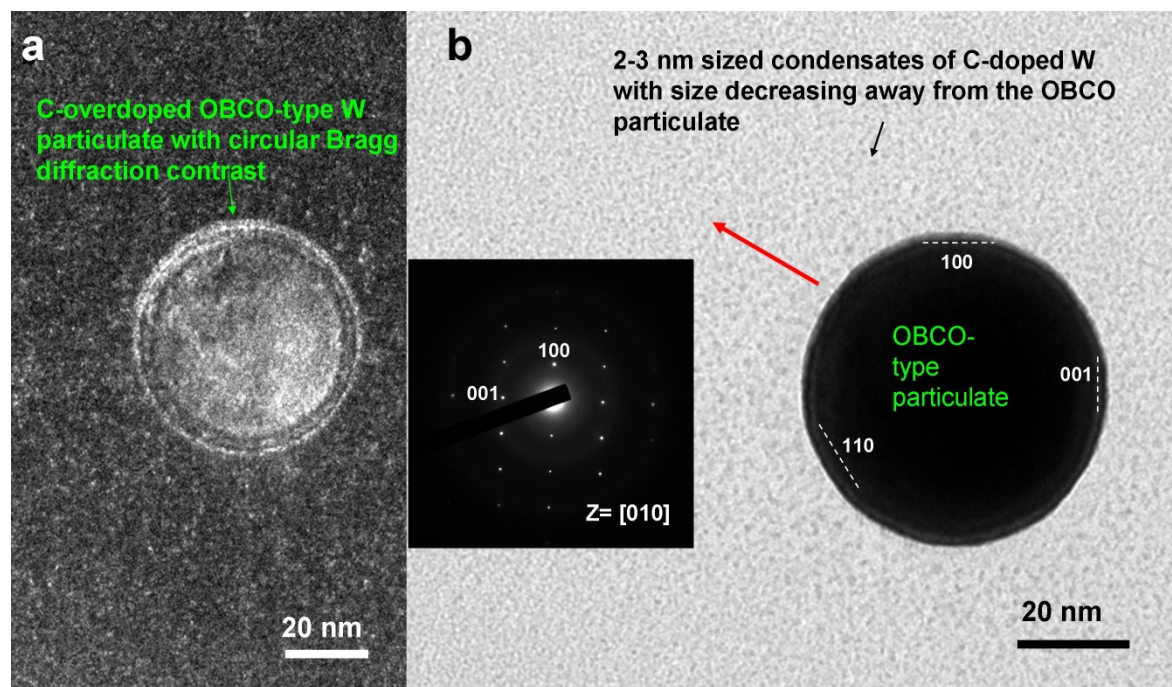

Supplement Fig. 1. TEM (a) CDFI ( $g=100$ ) and (b) BFI with inset SAED pattern of the C-overdoped OBCO-type W particulate with principal-plane facets edge on in the  $[010]$  zone axis and annular Bragg diffraction contrast due to inhomogeneous C content and shear stress to have ordered domain (cf. text). There are C-doped W nanocondensates with size decreasing away from the particulate, i.e. along the direction indicated by the red arrow.
